# Supplementary material for: Binding Free Energy Calculation Based on the Fragment Molecular Orbital Method and Its Application in Designing Novel SHP-2 Allosteric Inhibitors
Source: MDPI journal article supplement (doi:10.3390/ijms25010671), 2024-01-04

Supporting Information

# Binding Free Energy Calculation Based on the Fragment Molecular Orbital Method and Its Application in Designing Novel SHP-2 Allosteric Inhibitors

Zhen Yuan <sup>1,†</sup>, Xingyu Chen <sup>1,†</sup>, Sisi Fan <sup>1</sup>, Longfeng Chang <sup>1</sup>, Linna Chu <sup>1</sup>, Ying Zhang <sup>1</sup>, Jie Wang <sup>1</sup>, Shuang Li <sup>1</sup>, Jinxin Xie <sup>1</sup>, Jianguo Hu <sup>1</sup>, Runyu Miao <sup>1</sup>, Lili Zhu <sup>1</sup>, Zhenjiang Zhao <sup>1</sup>, Honglin Li <sup>1,2,3,\*</sup> and Shiliang Li <sup>1,2,\*</sup>

<sup>1</sup> Shanghai Key Laboratory of New Drug Design, State Key Laboratory of Bioreactor Engineering, School of Pharmacy, East China University of Science & Technology, Shanghai 200237, China; y12212121@mail.ecust.edu.cn (Z.Y.); y30211246@mail.ecust.edu.cn (X.C.); y30201249@mail.ecust.edu.cn (S.F.); zhjzhao@ecust.edu.cn (Z.Z.)

<sup>2</sup> Innovation Center for AI and Drug Discovery, East China Normal University, Shanghai 200062, China

<sup>3</sup> Lingang Laboratory, Shanghai 200031, China

\* Correspondence: hlli@ecust.edu.cn (H.L.); slli@hsc.ecnu.edu.cn (S.L.)

† These authors contributed equally to this work.

**Table S1. Results for ranking with different affinity prediction methods in Schrödinger FEP+ benchmark set.**

| Protein        | FMO |                                      |                                       |                                       |                                      | FMOScore |                                      |                                      |                                      |                                      | FEP+ |                                      |                                      |                                      |                                      |
|----------------|-----|--------------------------------------|---------------------------------------|---------------------------------------|--------------------------------------|----------|--------------------------------------|--------------------------------------|--------------------------------------|--------------------------------------|------|--------------------------------------|--------------------------------------|--------------------------------------|--------------------------------------|
|                | N   | R                                    | $\rho$                                | $\tau$                                | RMSE                                 | N        | R                                    | $\rho$                               | $\tau$                               | RMSE                                 | N    | R                                    | $\rho$                               | $\tau$                               | RMSE                                 |
| CDK8           | 32  | 0.78 <sup>0.71</sup> <sub>0.85</sub> | 0.82 <sup>0.73</sup> <sub>0.89</sub>  | 0.64 <sup>0.52</sup> <sub>0.73</sub>  | 0.93 <sup>0.64</sup> <sub>1.26</sub> | 32       | 0.81 <sup>0.72</sup> <sub>0.88</sub> | 0.84 <sup>0.75</sup> <sub>0.92</sub> | 0.67 <sup>0.56</sup> <sub>0.78</sub> | 0.88 <sup>0.63</sup> <sub>1.15</sub> | 32   | 0.64 <sup>0.44</sup> <sub>0.81</sub> | 0.67 <sup>0.46</sup> <sub>0.84</sub> | 0.53 <sup>0.36</sup> <sub>0.69</sub> | 1.11 <sup>0.66</sup> <sub>1.55</sub> |
| c-Met          | 24  | 0.83 <sup>0.72</sup> <sub>0.91</sub> | 0.79 <sup>0.60</sup> <sub>0.92</sub>  | 0.65 <sup>0.47</sup> <sub>0.80</sub>  | 1.04 <sup>0.71</sup> <sub>1.37</sub> | 24       | 0.90 <sup>0.82</sup> <sub>0.96</sub> | 0.90 <sup>0.79</sup> <sub>0.97</sub> | 0.77 <sup>0.64</sup> <sub>0.88</sub> | 0.78 <sup>0.43</sup> <sub>1.09</sub> | 24   | 0.91 <sup>0.85</sup> <sub>0.95</sub> | 0.88 <sup>0.77</sup> <sub>0.95</sub> | 0.75 <sup>0.63</sup> <sub>0.85</sub> | 0.76 <sup>0.57</sup> <sub>0.97</sub> |
| Eg5            | 28  | 0.68 <sup>0.48</sup> <sub>0.83</sub> | 0.59 <sup>0.31</sup> <sub>0.81</sub>  | 0.56 <sup>0.22</sup> <sub>0.65</sub>  | 0.69 <sup>0.47</sup> <sub>0.91</sub> | 28       | 0.79 <sup>0.66</sup> <sub>0.88</sub> | 0.74 <sup>0.54</sup> <sub>0.89</sub> | 0.60 <sup>0.41</sup> <sub>0.76</sub> | 0.58 <sup>0.41</sup> <sub>0.76</sub> | 28   | 0.73 <sup>0.57</sup> <sub>0.86</sub> | 0.71 <sup>0.52</sup> <sub>0.86</sub> | 0.57 <sup>0.40</sup> <sub>0.73</sub> | 0.68 <sup>0.47</sup> <sub>0.92</sub> |
| HIF-2 $\alpha$ | 42  | 0.31 <sup>0.05</sup> <sub>0.54</sub> | 0.23 <sup>-0.05</sup> <sub>0.49</sub> | 0.16 <sup>-0.03</sup> <sub>0.36</sub> | 1.12 <sup>0.78</sup> <sub>1.46</sub> | 42       | 0.43 <sup>0.13</sup> <sub>0.67</sub> | 0.28 <sup>0.01</sup> <sub>0.53</sub> | 0.21 <sup>0.77</sup> <sub>0.40</sub> | 1.07 <sup>0.23</sup> <sub>1.38</sub> | 42   | 0.57 <sup>0.29</sup> <sub>0.80</sub> | 0.54 <sup>0.29</sup> <sub>0.74</sub> | 0.41 <sup>0.22</sup> <sub>0.58</sub> | 0.98 <sup>0.62</sup> <sub>1.34</sub> |
| PFKFB3         | 40  | 0.86 <sup>0.80</sup> <sub>0.91</sub> | 0.84 <sup>0.75</sup> <sub>0.90</sub>  | 0.77 <sup>0.56</sup> <sub>0.76</sub>  | 0.56 <sup>0.42</sup> <sub>0.69</sub> | 40       | 0.90 <sup>0.85</sup> <sub>0.93</sub> | 0.89 <sup>0.81</sup> <sub>0.94</sub> | 0.73 <sup>0.63</sup> <sub>0.81</sub> | 0.49 <sup>0.37</sup> <sub>0.63</sub> | 40   | 0.81 <sup>0.73</sup> <sub>0.88</sub> | 0.81 <sup>0.71</sup> <sub>0.89</sub> | 0.64 <sup>0.53</sup> <sub>0.74</sub> | 0.64 <sup>0.47</sup> <sub>0.80</sub> |
| SHP-2          | 26  | 0.57 <sup>0.34</sup> <sub>0.74</sub> | 0.59 <sup>0.33</sup> <sub>0.79</sub>  | 0.45 <sup>0.26</sup> <sub>0.63</sub>  | 1.05 <sup>0.76</sup> <sub>1.39</sub> | 26       | 0.80 <sup>0.70</sup> <sub>0.88</sub> | 0.75 <sup>0.56</sup> <sub>0.88</sub> | 0.56 <sup>0.39</sup> <sub>0.70</sub> | 0.76 <sup>0.50</sup> <sub>1.02</sub> | 26   | 0.73 <sup>0.58</sup> <sub>0.85</sub> | 0.71 <sup>0.50</sup> <sub>0.87</sub> | 0.57 <sup>0.39</sup> <sub>0.73</sub> | 0.88 <sup>0.64</sup> <sub>1.15</sub> |
| SYK            | 39  | 0.43 <sup>0.27</sup> <sub>0.57</sub> | 0.43 <sup>0.21</sup> <sub>0.57</sub>  | 0.31 <sup>0.15</sup> <sub>0.27</sub>  | 0.77 <sup>0.57</sup> <sub>0.96</sub> | 39       | 0.76 <sup>0.62</sup> <sub>0.87</sub> | 0.76 <sup>0.61</sup> <sub>0.88</sub> | 0.61 <sup>0.46</sup> <sub>0.74</sub> | 0.54 <sup>0.37</sup> <sub>0.72</sub> | 39   | 0.47 <sup>0.18</sup> <sub>0.70</sub> | 0.40 <sup>0.16</sup> <sub>0.60</sub> | 0.28 <sup>0.11</sup> <sub>0.43</sub> | 0.75 <sup>0.56</sup> <sub>0.94</sub> |
| TNKS2          | 27  | 0.36 <sup>0.05</sup> <sub>0.58</sub> | 0.21 <sup>-0.19</sup> <sub>0.54</sub> | 0.10 <sup>-0.19</sup> <sub>0.37</sub> | 1.02 <sup>0.65</sup> <sub>1.35</sub> | 27       | 0.62 <sup>0.29</sup> <sub>0.85</sub> | 0.50 <sup>0.17</sup> <sub>0.77</sub> | 0.39 <sup>0.12</sup> <sub>0.63</sub> | 0.86 <sup>0.51</sup> <sub>1.19</sub> | 27   | 0.46 <sup>0.16</sup> <sub>0.70</sub> | 0.43 <sup>0.10</sup> <sub>0.69</sub> | 0.32 <sup>0.07</sup> <sub>0.54</sub> | 0.98 <sup>0.66</sup> <sub>1.29</sub> |
| Total          | 258 | 0.62 <sup>0.55</sup> <sub>0.68</sub> | 0.64 <sup>0.57</sup> <sub>0.70</sub>  | 0.47 <sup>0.41</sup> <sub>0.52</sub>  | 1.14 <sup>1.02</sup> <sub>1.26</sub> | 258      | 0.87 <sup>0.84</sup> <sub>0.89</sub> | 0.87 <sup>0.84</sup> <sub>0.89</sub> | 0.69 <sup>0.65</sup> <sub>0.72</sub> | 0.71 <sup>0.62</sup> <sub>0.80</sub> | 258  | 0.78 <sup>0.74</sup> <sub>0.83</sub> | 0.77 <sup>0.71</sup> <sub>0.81</sub> | 0.58 <sup>0.53</sup> <sub>0.63</sub> | 0.89 <sup>0.77</sup> <sub>1.00</sub> |

  

| Protein        | MM/GBSA |                                       |                                        |                                        |                                      | MM/PBSA |                                        |                                        |                                        |                                      | Vina |                                         |                                         |                                         |                                      |
|----------------|---------|---------------------------------------|----------------------------------------|----------------------------------------|--------------------------------------|---------|----------------------------------------|----------------------------------------|----------------------------------------|--------------------------------------|------|-----------------------------------------|-----------------------------------------|-----------------------------------------|--------------------------------------|
|                | N       | R                                     | $\rho$                                 | $\tau$                                 | RMSE                                 | N       | R                                      | $\rho$                                 | $\tau$                                 | RMSE                                 | N    | R                                       | $\rho$                                  | $\tau$                                  | RMSE                                 |
| CDK8           | 32      | 0.30 <sup>0.03</sup> <sub>0.68</sub>  | 0.45 <sup>0.16</sup> <sub>0.71</sub>   | 0.33 <sup>0.11</sup> <sub>0.53</sub>   | 1.42 <sup>0.93</sup> <sub>2.09</sub> | 32      | 0.02 <sup>-0.34</sup> <sub>0.38</sub>  | -0.04 <sup>-0.34</sup> <sub>0.38</sub> | -0.02 <sup>-0.27</sup> <sub>0.24</sub> | 1.50 <sup>1.02</sup> <sub>2.03</sub> | 32   | 0.58 <sup>0.35</sup> <sub>0.79</sub>    | 0.61 <sup>0.36</sup> <sub>0.80</sub>    | 0.48 <sup>0.27</sup> <sub>0.66</sub>    | 1.17 <sup>0.73</sup> <sub>1.70</sub> |
| c-Met          | 24      | 0.68 <sup>0.48</sup> <sub>0.83</sub>  | 0.72 <sup>0.47</sup> <sub>0.89</sub>   | 0.59 <sup>0.39</sup> <sub>0.77</sub>   | 1.43 <sup>0.89</sup> <sub>2.02</sub> | 24      | 0.23 <sup>-0.16</sup> <sub>0.56</sub>  | 0.15 <sup>-0.25</sup> <sub>0.51</sub>  | 0.10 <sup>-0.19</sup> <sub>0.39</sub>  | 1.83 <sup>1.26</sup> <sub>2.46</sub> | 24   | -0.31 <sup>-0.56</sup> <sub>-0.05</sub> | -0.37 <sup>-0.62</sup> <sub>-0.07</sub> | -0.22 <sup>-0.44</sup> <sub>0</sub>     | 1.80 <sup>1.26</sup> <sub>2.32</sub> |
| Eg5            | 28      | 0.43 <sup>0.11</sup> <sub>0.69</sub>  | 0.41 <sup>0.08</sup> <sub>0.70</sub>   | 0.30 <sup>0.04</sup> <sub>0.53</sub>   | 0.88 <sup>0.61</sup> <sub>1.17</sub> | 28      | 0.02 <sup>-0.27</sup> <sub>0.31</sub>  | 0.10 <sup>-0.25</sup> <sub>0.43</sub>  | 0.05 <sup>-0.20</sup> <sub>0.29</sub>  | 0.96 <sup>0.65</sup> <sub>1.27</sub> | 28   | -0.44 <sup>-0.65</sup> <sub>-0.22</sub> | -0.47 <sup>-0.69</sup> <sub>-0.20</sub> | -0.31 <sup>-0.50</sup> <sub>-0.10</sub> | 0.84 <sup>0.51</sup> <sub>1.15</sub> |
| HIF-2 $\alpha$ | 42      | 0.19 <sup>-0.03</sup> <sub>0.43</sub> | 0.23 <sup>0.0003</sup> <sub>0.45</sub> | 0.15 <sup>-0.005</sup> <sub>0.30</sub> | 1.15 <sup>0.82</sup> <sub>1.52</sub> | 42      | 0.26 <sup>0.001</sup> <sub>0.51</sub>  | 0.20 <sup>-0.06</sup> <sub>0.45</sub>  | 0.15 <sup>-0.04</sup> <sub>0.33</sub>  | 1.14 <sup>0.80</sup> <sub>1.49</sub> | 42   | 0.28 <sup>0.003</sup> <sub>0.54</sub>   | 0.50 <sup>0.26</sup> <sub>0.70</sub>    | 0.39 <sup>0.21</sup> <sub>0.56</sub>    | 1.13 <sup>0.76</sup> <sub>1.50</sub> |
| PFKFB3         | 40      | 0.48 <sup>0.23</sup> <sub>0.70</sub>  | 0.45 <sup>0.19</sup> <sub>0.69</sub>   | 0.35 <sup>0.14</sup> <sub>0.51</sub>   | 0.99 <sup>0.73</sup> <sub>1.28</sub> | 40      | 0.26 <sup>0.01</sup> <sub>0.49</sub>   | 0.28 <sup>0.005</sup> <sub>0.54</sub>  | 0.21 <sup>0.01</sup> <sub>0.41</sub>   | 1.10 <sup>0.87</sup> <sub>1.34</sub> | 40   | 0.35 <sup>0.13</sup> <sub>0.54</sub>    | 0.33 <sup>0.10</sup> <sub>0.54</sub>    | 0.22 <sup>0.05</sup> <sub>0.38</sub>    | 1.06 <sup>0.84</sup> <sub>1.28</sub> |
| SHP-2          | 26      | 0.34 <sup>0.08</sup> <sub>0.64</sub>  | 0.35 <sup>0.02</sup> <sub>0.67</sub>   | 0.31 <sup>0.08</sup> <sub>0.55</sub>   | 1.24 <sup>0.82</sup> <sub>1.75</sub> | 26      | 0.50 <sup>0.19</sup> <sub>0.77</sub>   | 0.48 <sup>0.18</sup> <sub>0.74</sub>   | 0.38 <sup>0.15</sup> <sub>0.59</sub>   | 1.19 <sup>0.70</sup> <sub>1.73</sub> | 26   | 0.37 <sup>0.04</sup> <sub>0.67</sub>    | 0.35 <sup>0.04</sup> <sub>0.64</sub>    | 0.35 <sup>0.01</sup> <sub>0.48</sub>    | 1.17 <sup>0.72</sup> <sub>1.61</sub> |
| SYK            | 39      | 0.50 <sup>0.29</sup> <sub>0.69</sub>  | 0.47 <sup>0.24</sup> <sub>0.68</sub>   | 0.36 <sup>0.19</sup> <sub>0.52</sub>   | 0.74 <sup>0.55</sup> <sub>0.93</sub> | 39      | 0.18 <sup>-0.12</sup> <sub>0.43</sub>  | 0.06 <sup>-0.23</sup> <sub>0.56</sub>  | 0.04 <sup>-0.16</sup> <sub>0.24</sub>  | 0.84 <sup>0.61</sup> <sub>1.06</sub> | 39   | 0.39 <sup>0.21</sup> <sub>0.56</sub>    | 0.35 <sup>0.14</sup> <sub>0.54</sub>    | 0.34 <sup>0.09</sup> <sub>0.37</sub>    | 0.77 <sup>0.55</sup> <sub>0.99</sub> |
| TNKS2          | 27      | 0.47 <sup>0.19</sup> <sub>0.69</sub>  | 0.41 <sup>0.13</sup> <sub>0.65</sub>   | 0.28 <sup>0.07</sup> <sub>0.48</sub>   | 0.96 <sup>0.63</sup> <sub>1.27</sub> | 27      | -0.21 <sup>-0.48</sup> <sub>0.03</sub> | -0.11 <sup>-0.43</sup> <sub>0.20</sub> | -0.09 <sup>-0.31</sup> <sub>0.12</sub> | 1.06 <sup>0.68</sup> <sub>0.36</sub> | 27   | -0.06 <sup>-0.35</sup> <sub>0.25</sub>  | 0.11 <sup>-0.22</sup> <sub>0.44</sub>   | 0.09 <sup>-0.14</sup> <sub>0.33</sub>   | 1.10 <sup>0.70</sup> <sub>1.44</sub> |
| Total          | 258     | 0.27 <sup>0.18</sup> <sub>0.36</sub>  | 0.27 <sup>0.17</sup> <sub>0.26</sub>   | 0.18 <sup>0.12</sup> <sub>0.25</sub>   | 1.39 <sup>1.25</sup> <sub>1.54</sub> | 258     | 0.13 <sup>0.03</sup> <sub>0.23</sub>   | 0.09 <sup>-0.01</sup> <sub>0.19</sub>  | 0.06 <sup>-0.01</sup> <sub>0.19</sub>  | 1.44 <sup>1.30</sup> <sub>1.57</sub> | 258  | 0.09 <sup>0.008</sup> <sub>0.18</sub>   | 0.09 <sup>0.00</sup> <sub>0.18</sub>    | 0.06 <sup>0.00</sup> <sub>0.12</sub>    | 1.44 <sup>1.30</sup> <sub>1.57</sub> |

**Table S2. Linear coefficients of FMOScore of 8 targets in Schrödinger FEP+ benchmark.**

| Target         | $\Delta E^{\text{int}}$ | $\Delta G^{\text{sol}}$ | $\Delta E_{\text{lig}}^{\text{def}}$ | constant |
|----------------|-------------------------|-------------------------|--------------------------------------|----------|
| CDK8           | 0.05066                 | -0.04087                | 0.02395                              | -3.05111 |
| c-Met          | 0.04297                 | 0.03001                 | 0.04486                              | -3.85653 |
| EG5            | 0.04591                 | -0.00677                | 0.01301                              | -6.73679 |
| HIF-2 $\alpha$ | 0.02229                 | 0.01377                 | 0.07526                              | -8.75932 |
| PFKFB3         | 0.05389                 | -0.00547                | 0.03022                              | -3.05507 |
| SHP2           | 0.02002                 | -0.02125                | 0.04421                              | -2.78159 |
| SYK            | 0.01577                 | -0.0056                 | 0.04735                              | -9.47309 |
| TNKS2          | 0.08894                 | -0.03104                | 0.05194                              | -1.31775 |

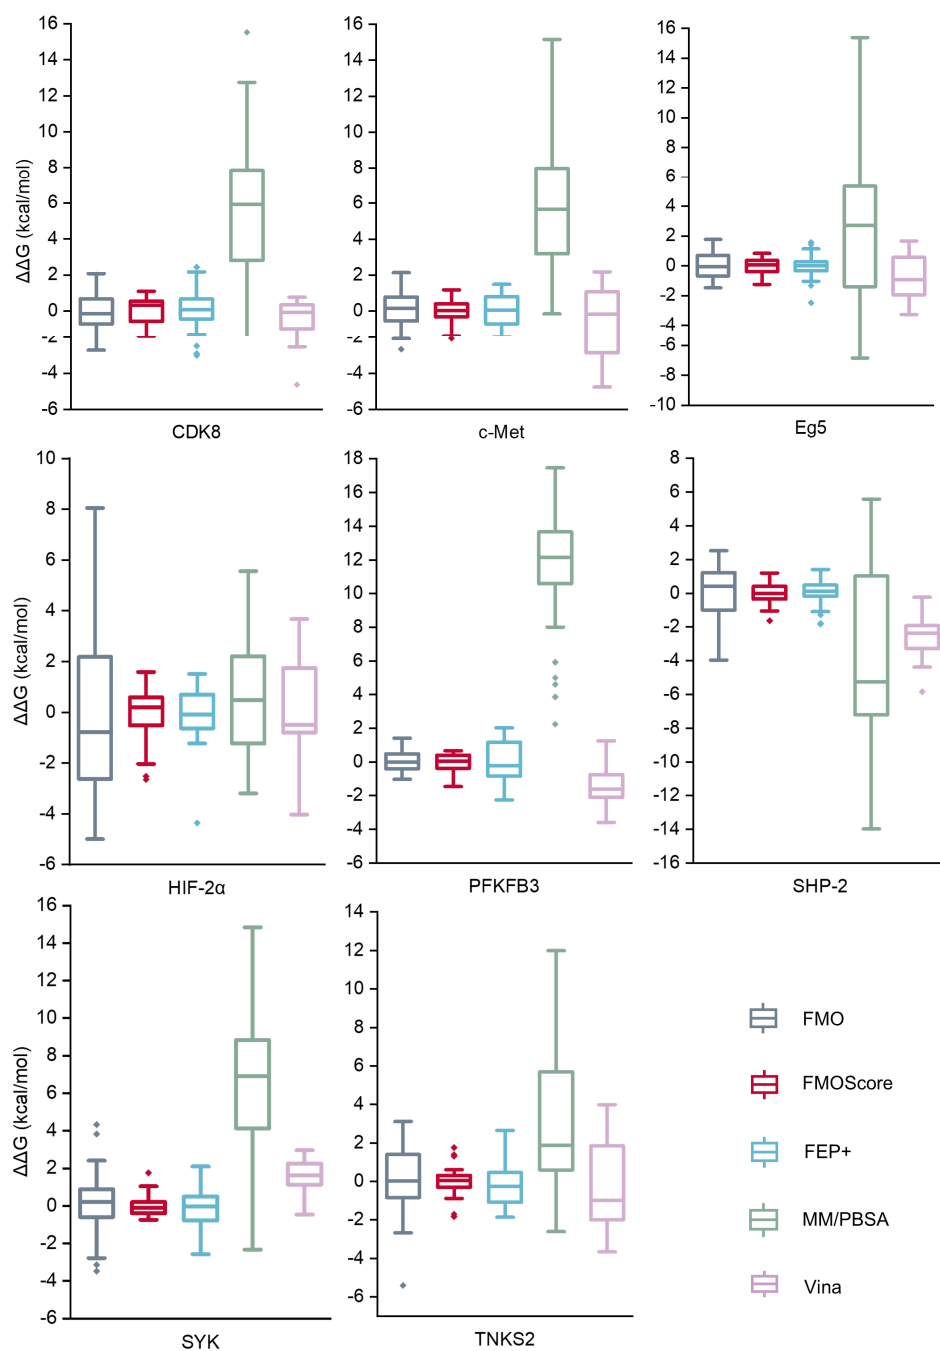

**Figure S1. Box-plot diagrams of the error for pairwise relative affinities  $|\Delta G_{\text{pred}} - \Delta G_{\text{exp}}|$ .**

**Table S3. Results of different energy term contributions for eight targets with the FMOScore method on a literature curated benchmark set.**

| Protein        | PDB ID <sup>a</sup> | $\Delta G_{\text{exp}}$ <sup>b</sup> | $\Delta G_{\text{pred}}$ <sup>c</sup> | $\Delta E^{\text{int}}$ |                        |                        |                            |                          | $\Delta G^{\text{sol}}$ | $\Delta E_{\text{lig}}^{\text{def}}$ |
|----------------|---------------------|--------------------------------------|---------------------------------------|-------------------------|------------------------|------------------------|----------------------------|--------------------------|-------------------------|--------------------------------------|
|                |                     |                                      |                                       | Total <sup>d</sup>      | $\Delta E_{\text{es}}$ | $\Delta E_{\text{ex}}$ | $\Delta E_{\text{ct+mix}}$ | $\Delta E_{\text{disp}}$ |                         |                                      |
| CDK8           | 5HNB                | -11.22                               | -11.86                                | -129.11                 | -93.83                 | 61.14                  | -26.82                     | -69.60                   | 61.73                   | 12.63                                |
| c-Met          | 4R1Y                | -8.73                                | -10.79                                | -174.79                 | -121.22                | 62.26                  | -28.53                     | -87.30                   | -30.36                  | 32.47                                |
| Eg5            | 3L9H                | -11.05                               | -11.04                                | -91.23                  | -43.25                 | 58.82                  | -25.41                     | -81.39                   | 119.70                  | 44.91                                |
| HIF-2 $\alpha$ | 5TBM                | -11.01                               | -10.54                                | -135.58                 | -92.19                 | 76.45                  | -32.98                     | -86.86                   | 43.36                   | 7.74                                 |
| PFKFB3         | 6HV1                | -10.3                                | -10.15                                | -134.46                 | -87.75                 | 72.19                  | -28.62                     | -90.27                   | 53.92                   | 10.37                                |
| SHP-2          | 5EHR                | -9.75                                | -9.76                                 | -141.73                 | -131.02                | 98.16                  | -30.97                     | -77.90                   | 196.22                  | 7.55                                 |
| SYK            | 4PV0                | -11.42                               | -10.75                                | -132.67                 | -94.44                 | 62.87                  | -24.57                     | -76.53                   | 69.14                   | 26.54                                |
| TNKS2          | 4UI5                | -10.05                               | -10.93                                | -106.69                 | -68.45                 | 69.01                  | -27.56                     | -79.69                   | 46.88                   | 14.78                                |

<sup>a</sup>The structures of the lead compounds in each target in the FEP+ benchmark have been selected for presentation, which are usually the starting points for structural modifications. <sup>b</sup>Experimental affinities were converted to  $\Delta G_{\text{exp}}$  values using the equation  $\Delta G_{\text{exp}} \approx k_B T \log \text{IC}_{50}$ . <sup>c</sup>Predicted binding free energy  $\Delta G_{\text{pred}}$  was fitted to the three types of energies calculated by the FMOScore method, consisting of binding affinities in vacuo ( $\Delta E^{\text{int}}$ ), solvation free energy ( $\Delta G^{\text{sol}}$ ), and deformation energy into the isolated form ( $\Delta E_{\text{lig}}^{\text{def}}$ ). <sup>d</sup>The total fragment pair interaction energy ( $\Delta E^{\text{int}}$ ) was decomposed into the electrostatic term ( $\Delta E_{\text{es}}$ ), exchange-repulsion term ( $\Delta E_{\text{ex}}$ ), charge transfer terms ( $\Delta E_{\text{ct+mix}}$ ), and dispersion term ( $\Delta E_{\text{disp}}$ ). All calculated values are in kcal/mol.

# SUPPORTING INFORMATION

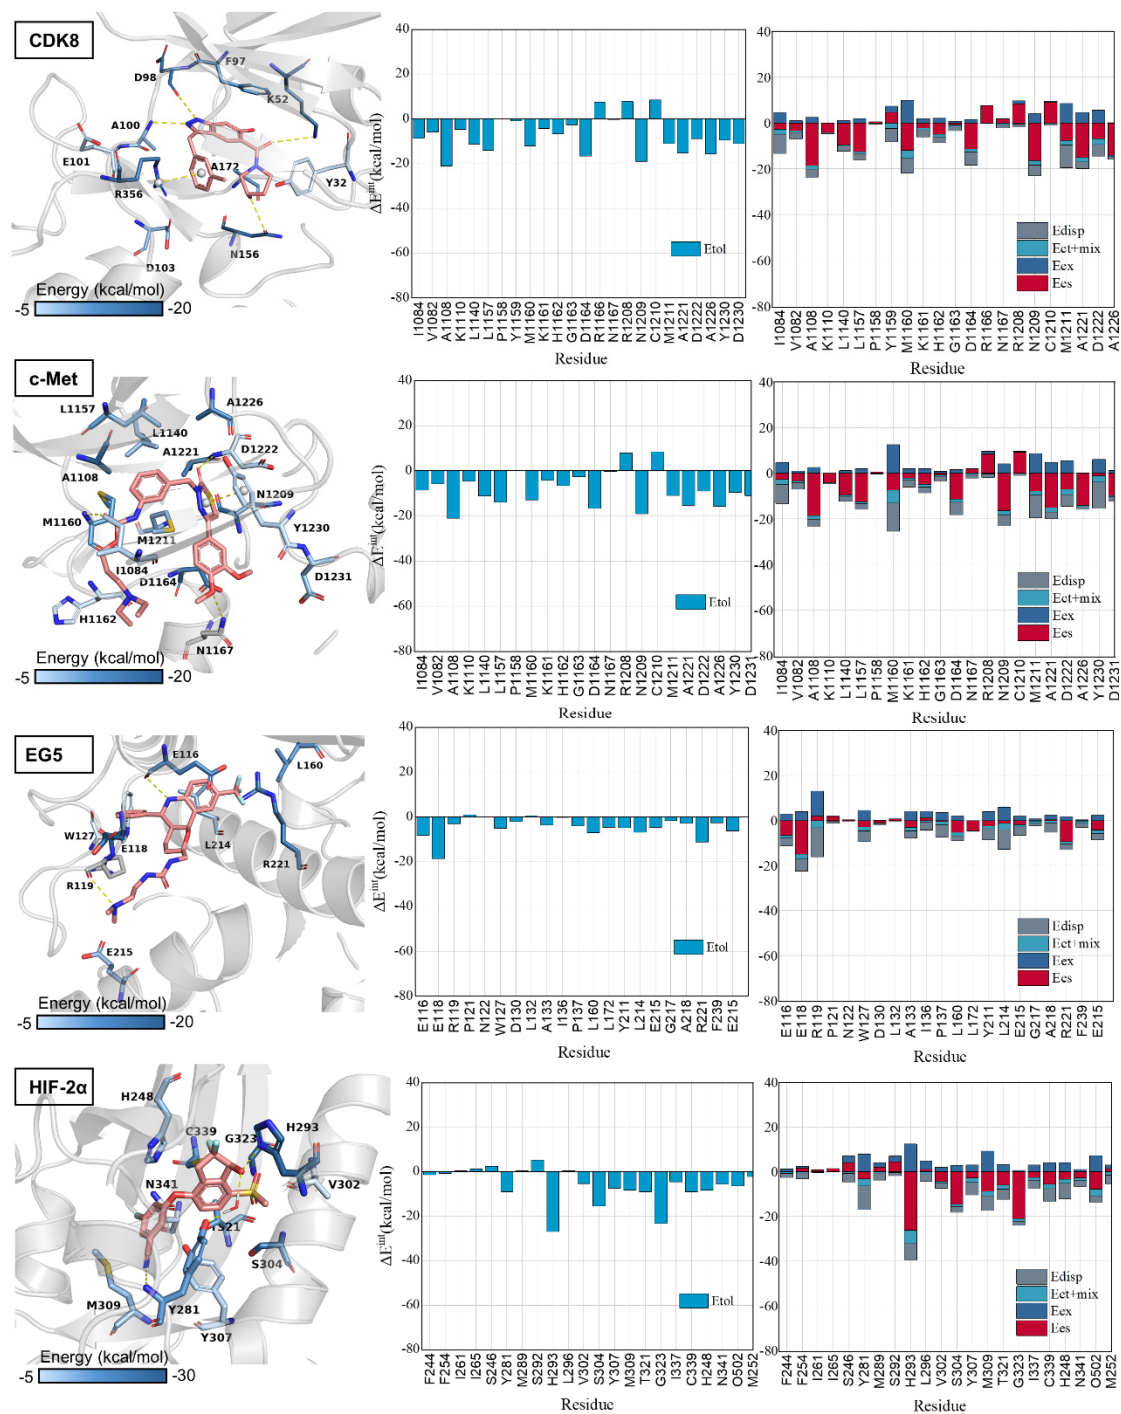

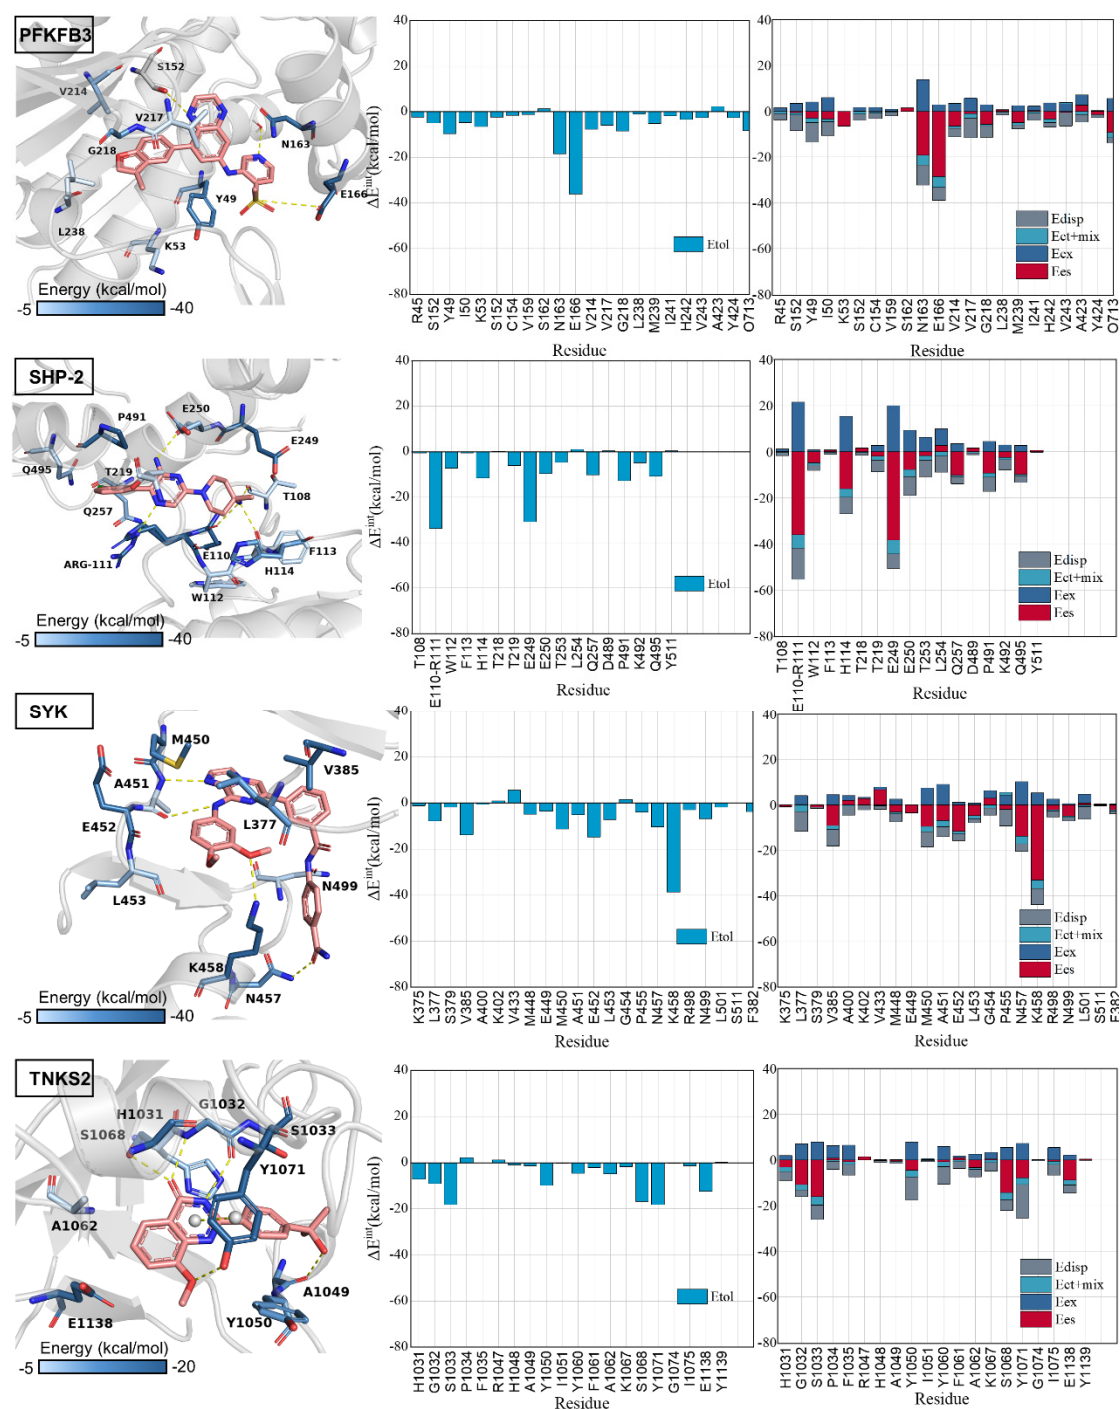

**Figure S2. FMO results of eight targets: CDK8 (PDB: 5HNB), c-Met (PDB: 4R1Y), EG5 (PDB: 3I9H), HIF-2 $\alpha$  (PDB: 5TBM), PFKFB3 (PDB: 6HVJ), SHP-2 (PDB: 5EHR), SYK (PDB: 4PV0), TNKS2 (PDB: 4UI5).** The key interactions according to FMO calculations are marked as yellow dashed lines, and key residues are shown in dark blue sticks. The left-hand bar plots describe PIE between the residues at the active site and ligands, and the right-hand plots show the PIEDA of these key interactions.

## SUPPORTING INFORMATION

---

The electrostatics, charge-transfer, dispersion, and exchange-repulsion PIE terms are represented in red, blue, gray, and dark blue, respectively.



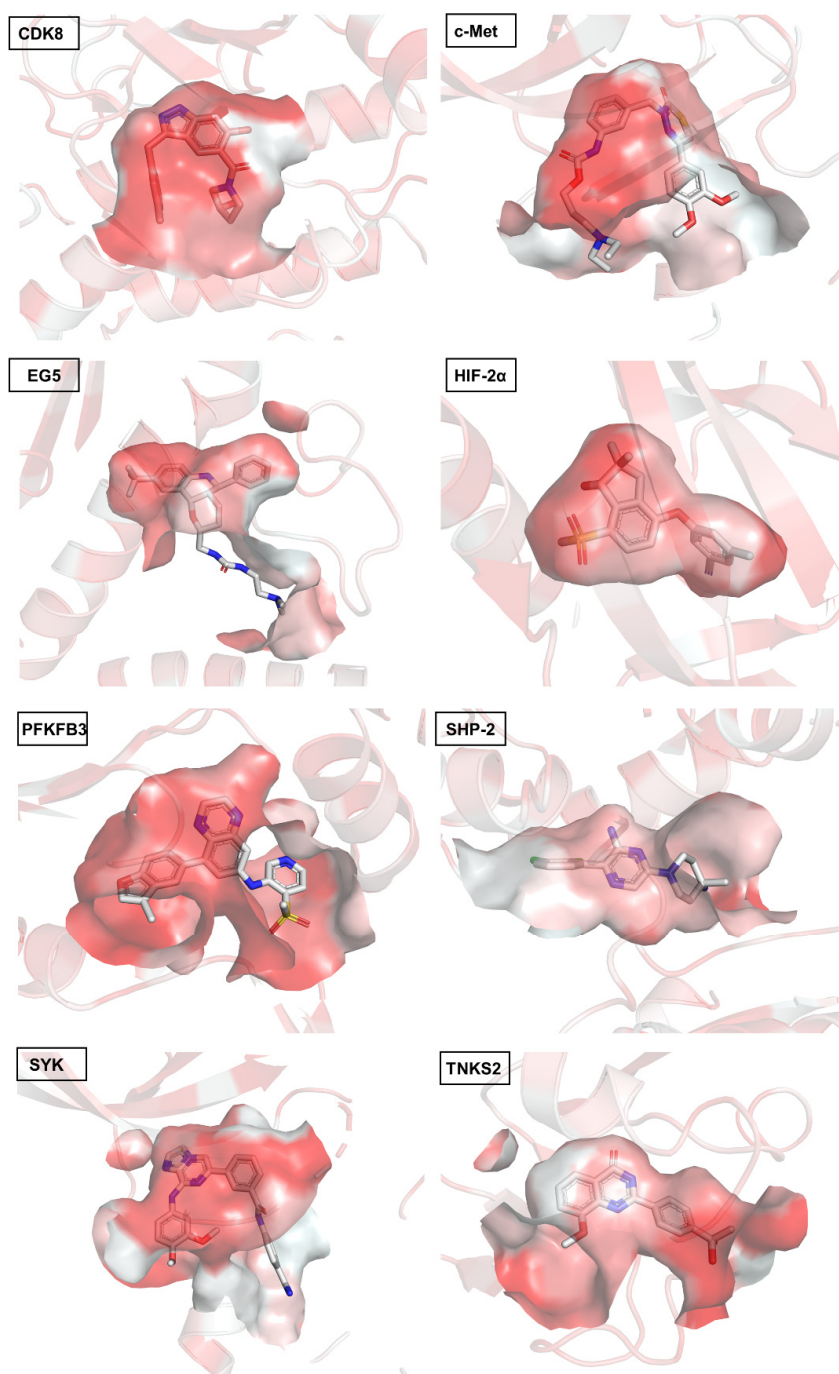

**Figure S3. Pocket shapes and hydrophobic surfaces were rendered with PyMOL (version 2.3.0) for the eight targets: CDK8 (PDB: 5HNB), c-Met (PDB: 4R1Y), EG5 (PDB: 3I9H), HIF-2 $\alpha$  (PDB: 5TBM), PFKFB3 (PDB: 6HVJ), SHP-2 (PDB: 5EHR), SYK (PDB: 4PV0), TNKS2 (PDB: 4UI5). The redder color indicates a stronger hydrophobic surface.**

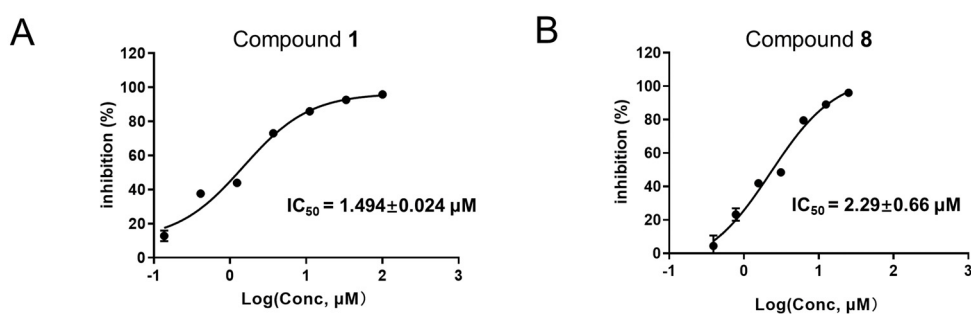

**Figure S4. Identification of SHP-2 inhibitors through biochemical screening.** (A-B) Compound **1** and **8** exhibited potent inhibitory activity against SHP-2. Phosphatase assays were conducted using the artificial substrate DIFMUP, and data represent mean  $\pm$  SD ( $n = 3$ ).

**Table S4.** Structure activity relationship study of THR- $\beta$  inhibition activities.

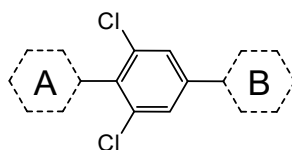

| Ligand   | Part A | Part B | THR- $\beta$<br>IC <sub>50</sub> ( $\mu$ M) <sup>a</sup> | $\Delta G_{\text{exp}}$ <sup>b</sup> | FMOScore (kcal/mol)                   |                         |                                      |                         |
|----------|--------|--------|----------------------------------------------------------|--------------------------------------|---------------------------------------|-------------------------|--------------------------------------|-------------------------|
|          |        |        |                                                          |                                      | $\Delta G_{\text{pred}}$ <sup>c</sup> | $\Delta E^{\text{int}}$ | $\Delta E^{\text{def}}_{\text{lig}}$ | $\Delta G^{\text{sol}}$ |
| <b>1</b> |        |        | 0.99 $\pm$ 0.08                                          | -8.186                               | -9.629                                | -101.46                 | 27.19                                | 245.55                  |
| <b>2</b> |        |        | >33                                                      | -6.110                               | -6.318                                | -80.016                 | 24.10                                | 224.18                  |
| <b>3</b> |        |        | 0.65 $\pm$ 0.07                                          | -8.435                               | -8.475                                | -105.35                 | 18.56                                | 236.24                  |
| <b>4</b> |        |        | >100                                                     | -5.453                               | -5.925                                | -84.49                  | 16.06                                | 224.85                  |

# SUPPORTING INFORMATION

|    |  |            |         |         |         |       |        |
|----|--|------------|---------|---------|---------|-------|--------|
| 5  |  | >100       | -5.453  | -6.624  | -78.58  | 19.95 | 236.48 |
| 6  |  | 0.03±0.01  | -10.257 | -9.177  | -112.88 | 22.27 | 232.94 |
| 7  |  | >3.7       | -7.406  | -7.832  | -95.74  | 22.45 | 231.71 |
| 8  |  | >1.2       | -8.072  | -7.740  | -91.58  | 20.76 | 237.49 |
| 9  |  | 0.20±0.05  | -9.133  | -9.539  | -107.01 | 21.70 | 245.91 |
| 10 |  | 0.02±0.001 | -10.497 | -9.468  | -101.48 | 25.28 | 245.88 |
| 11 |  | 0.07±0.01  | -9.755  | -9.921  | -106.95 | 26.54 | 244.73 |
| 12 |  | 0.03±0.01  | -10.257 | -10.135 | -107.75 | 27.03 | 246.33 |
| 13 |  | 0.03±0.007 | -10.257 | -9.983  | -110.78 | 27.52 | 239.90 |
| 14 |  | 0.02±0.006 | -10.497 | -10.126 | -100.10 | 32.65 | 246.69 |
| 15 |  | 0.04±0.01  | -10.086 | -10.282 | -106.87 | 35.74 | 236.90 |

## SUPPORTING INFORMATION

---

|           |                                                                                   |                   |         |         |         |       |        |
|-----------|-----------------------------------------------------------------------------------|-------------------|---------|---------|---------|-------|--------|
| <b>16</b> | 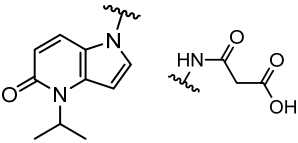 | $0.21 \pm 0.06$   | -9.105  | -10.820 | -99.17  | 30.21 | 261.81 |
| <b>17</b> |  | $0.04 \pm 0.007$  | -10.086 | -7.824  | -75.72  | 24.64 | 251.07 |
| <b>18</b> |  | $0.009 \pm 0.003$ | -10.970 | -10.192 | -108.04 | 28.32 | 245.01 |
|           | $R^2$                                                                             | -                 | -       | 0.71    | 0.46    | 0.40  | 0.37   |

---

## SUPPORTING INFORMATION

The spectra of  $^1\text{H}$  NMR,  $^{13}\text{C}$  NMR and HRMS (ESI) of all final compounds

### Compound 1

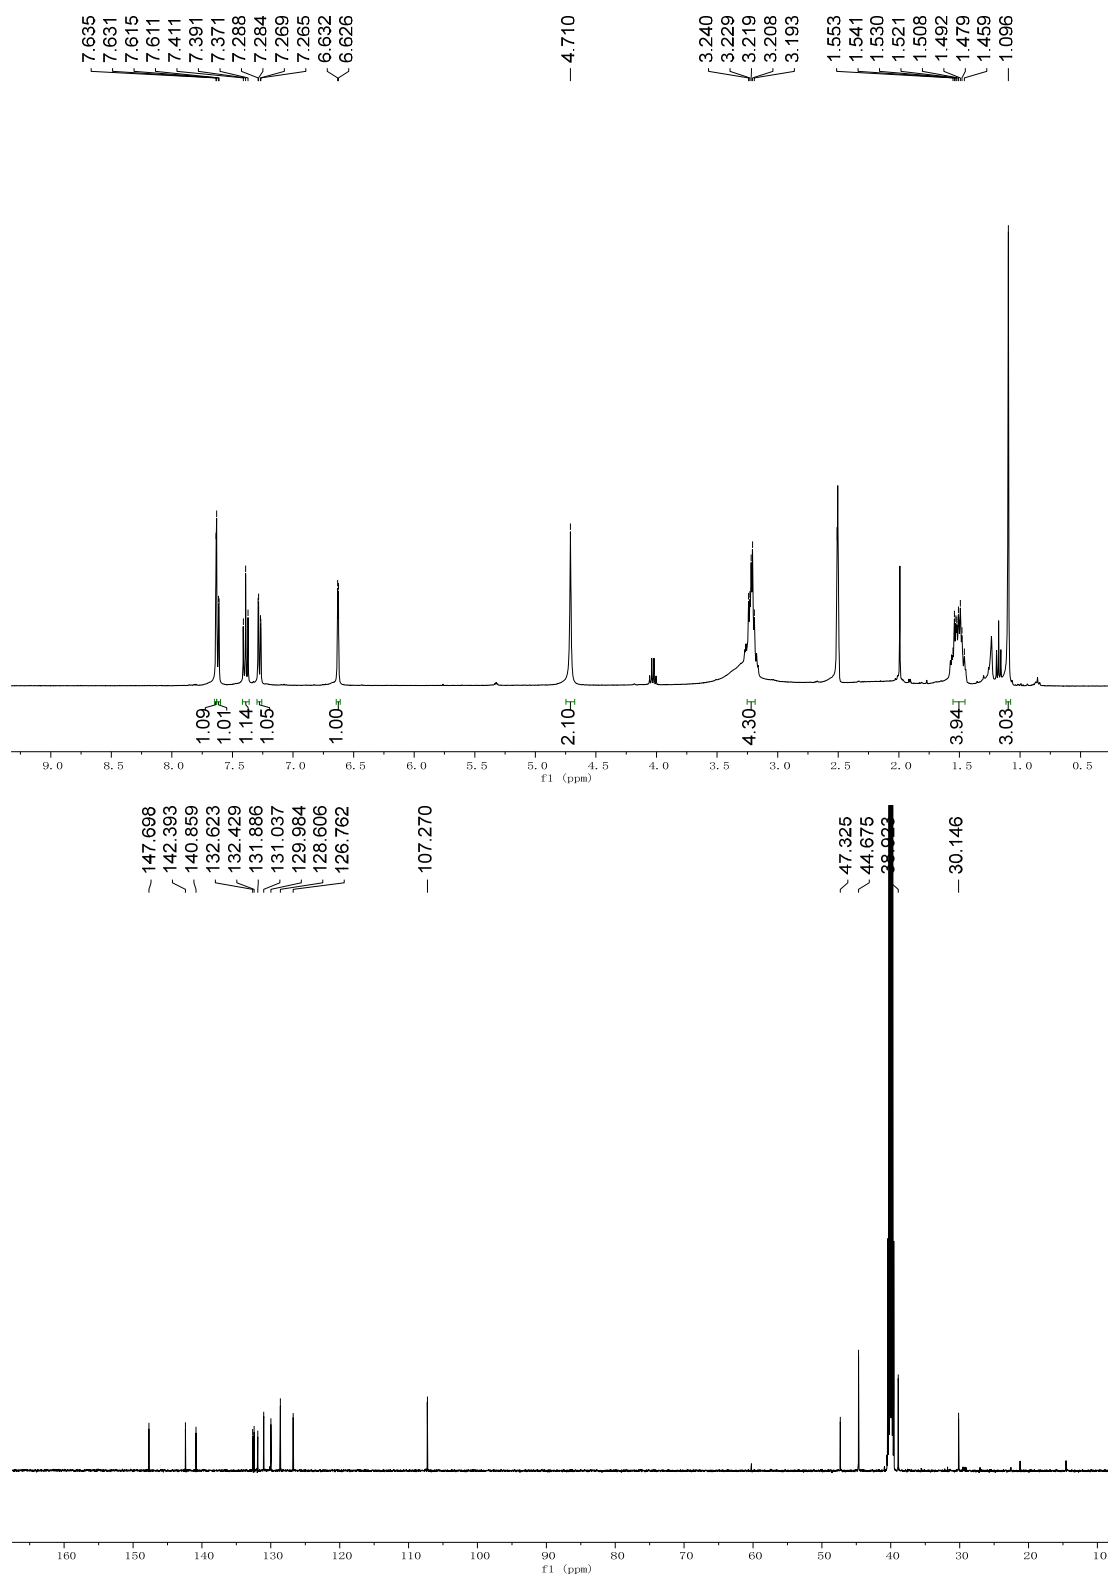

# SUPPORTING INFORMATION

20210742 221 (2.168) Cm (221-(490+496))

1: TOF MS ES+  
1.92e6

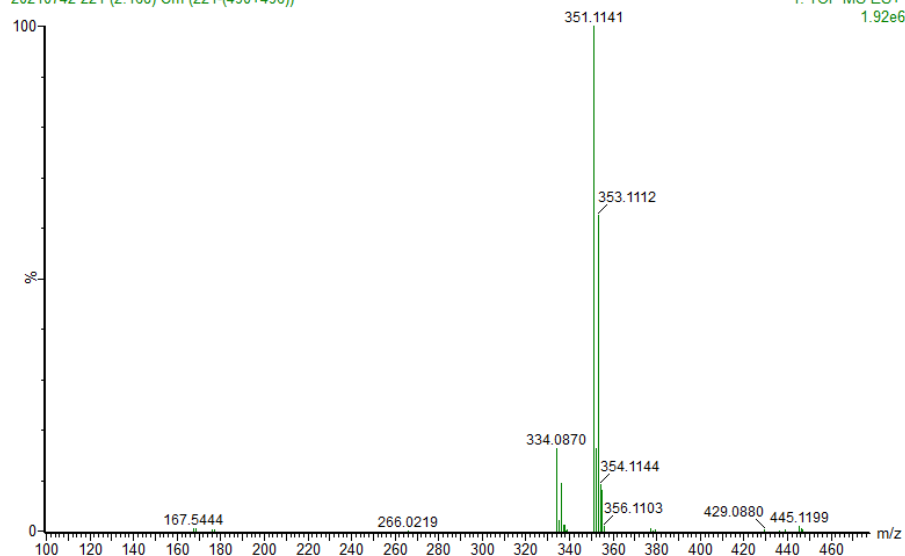

## Compound 2

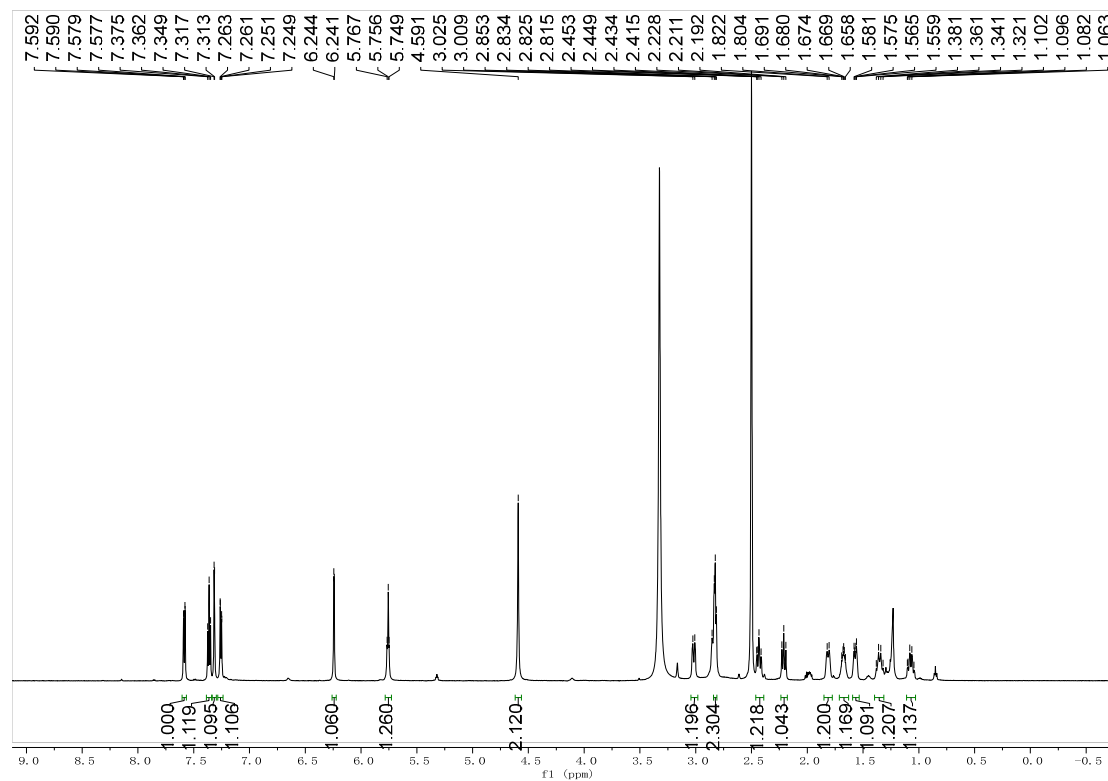

## SUPPORTING INFORMATION

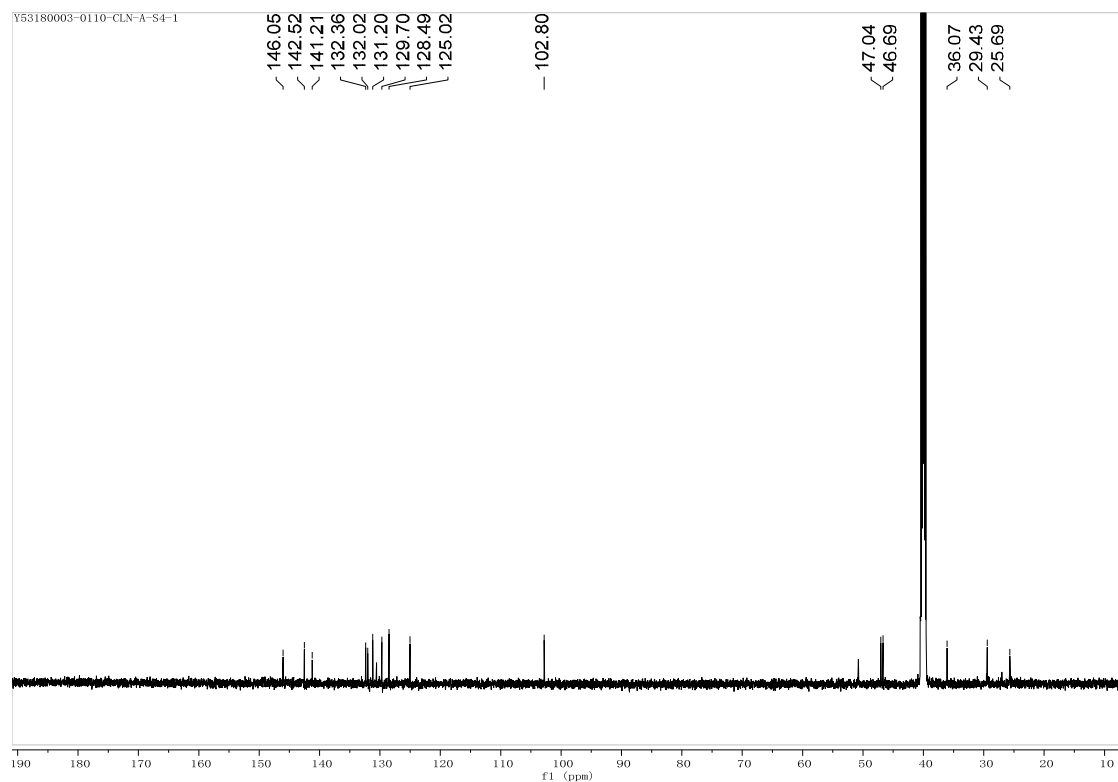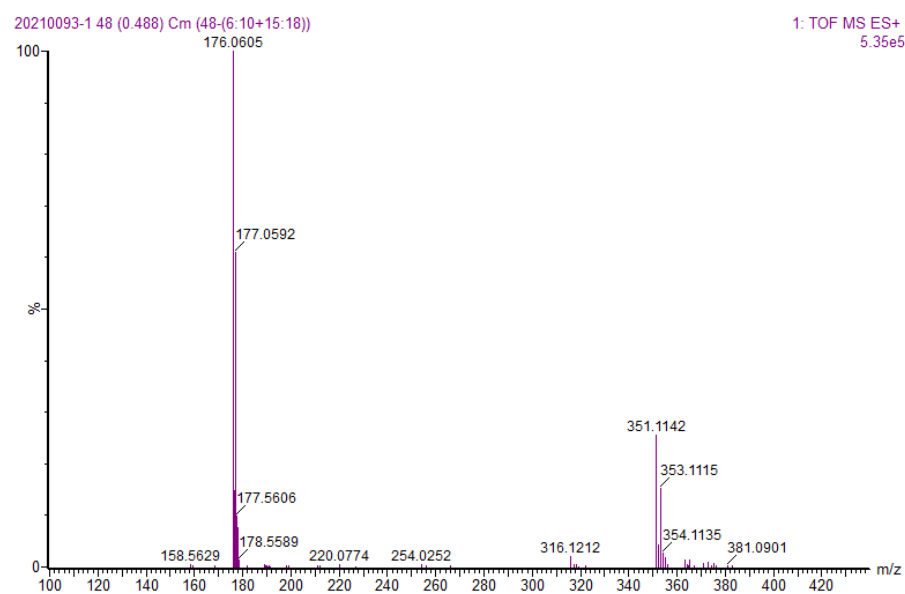

### Compound 3

# SUPPORTING INFORMATION

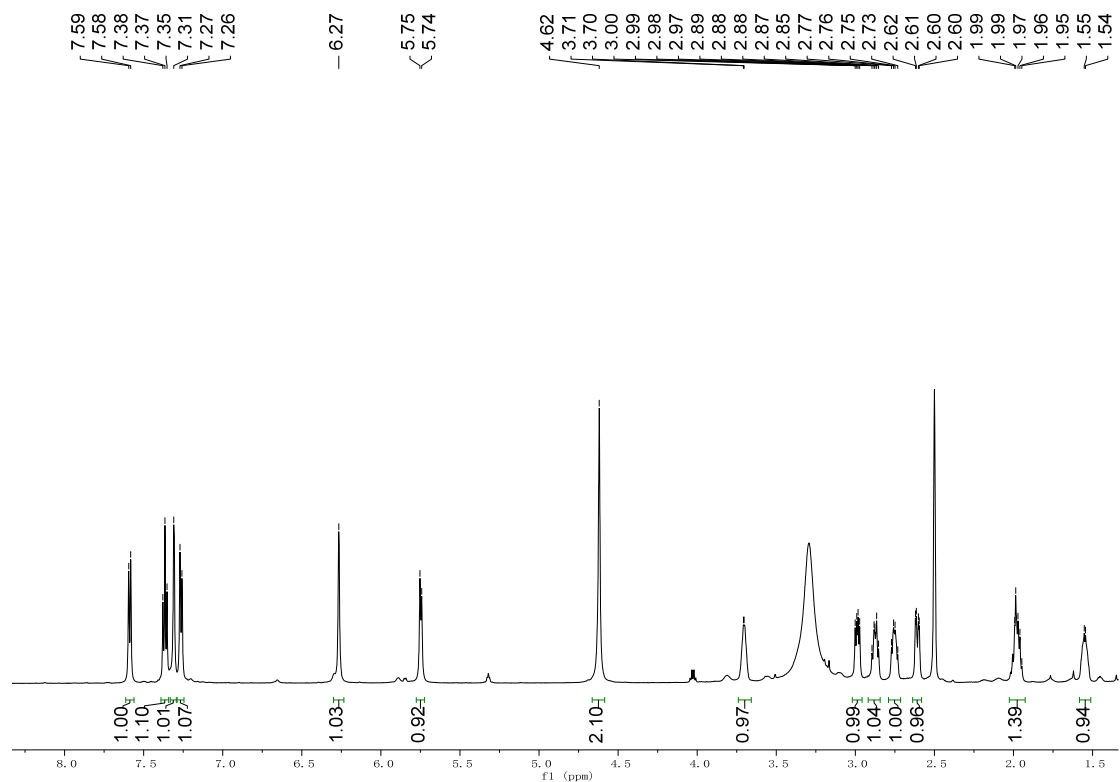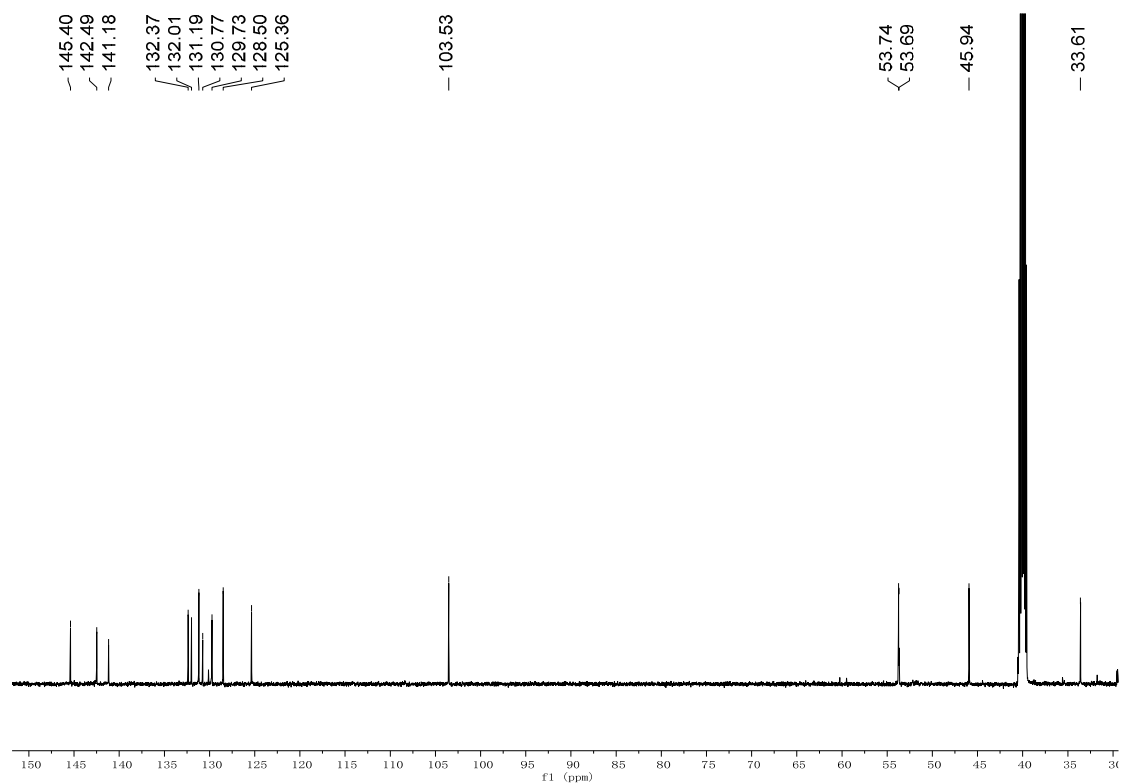



# SUPPORTING INFORMATION

20210094-2 199 (1.723) Cm (199-(40:44+79:84))

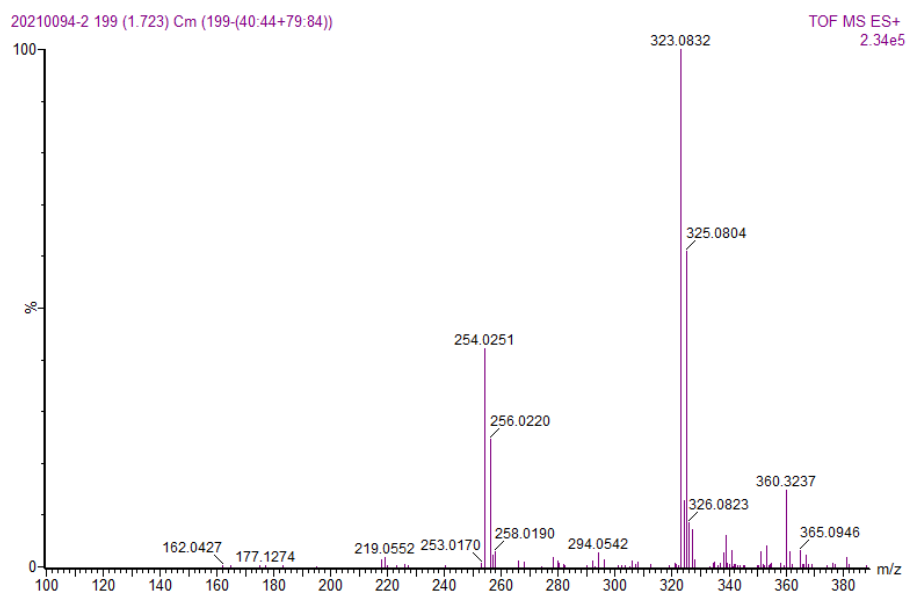

## Compound: 4

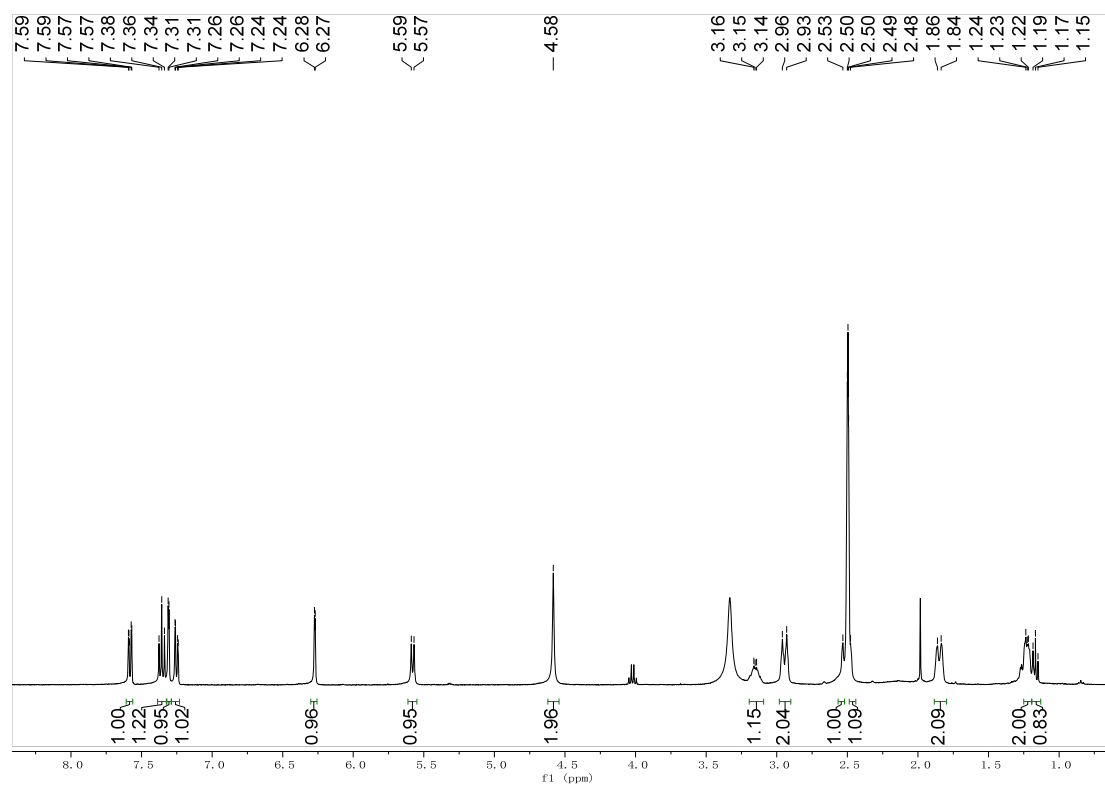

# SUPPORTING INFORMATION

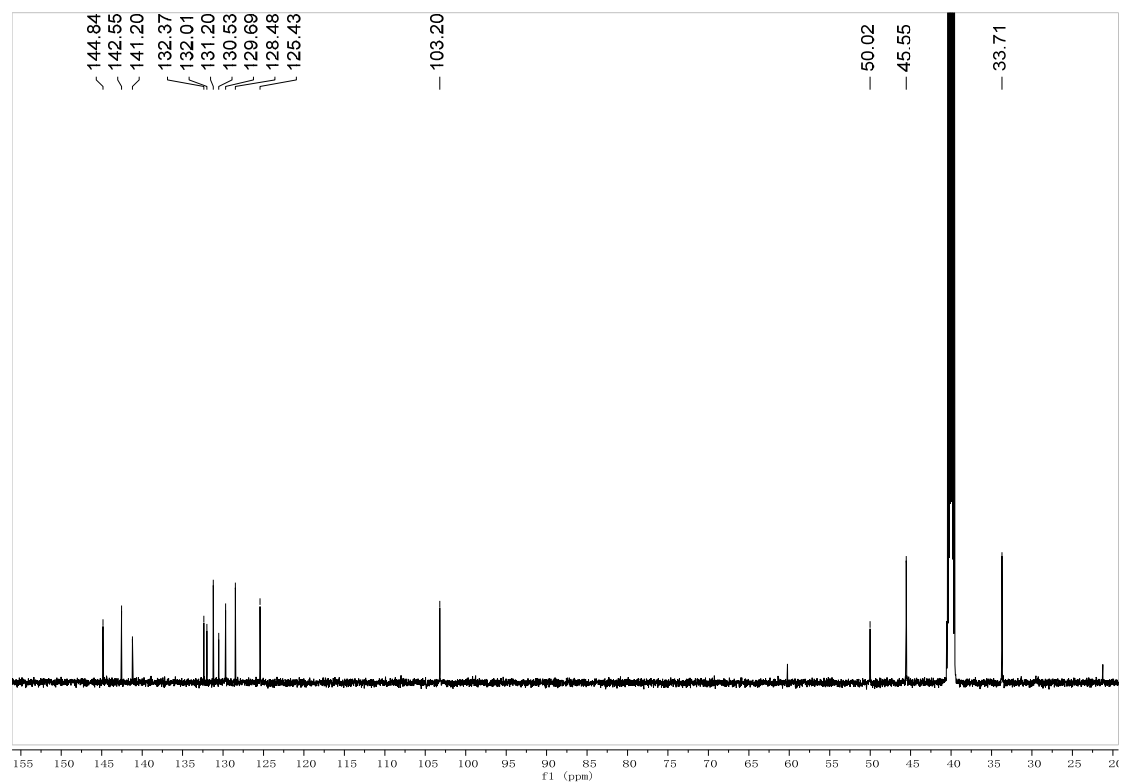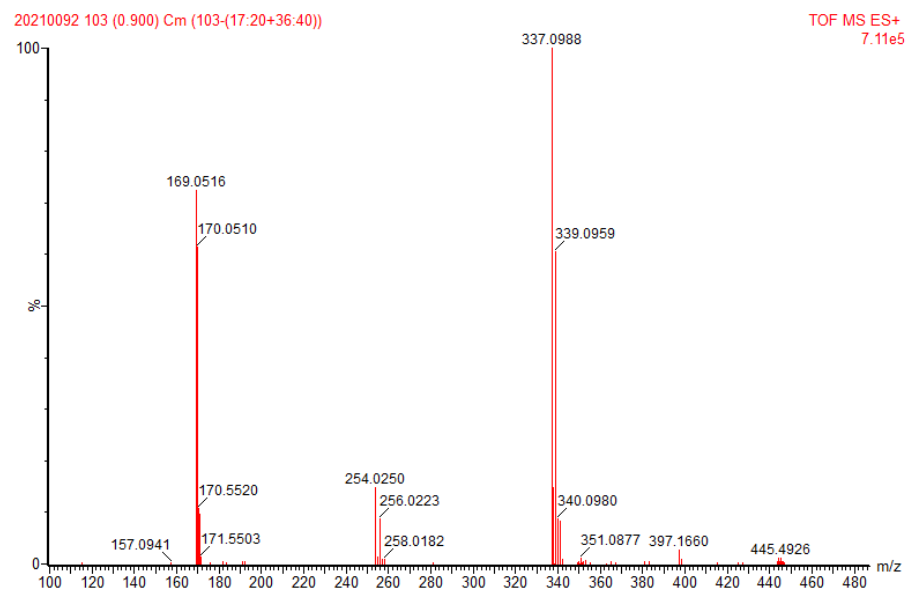

**Compound: 5**

# SUPPORTING INFORMATION

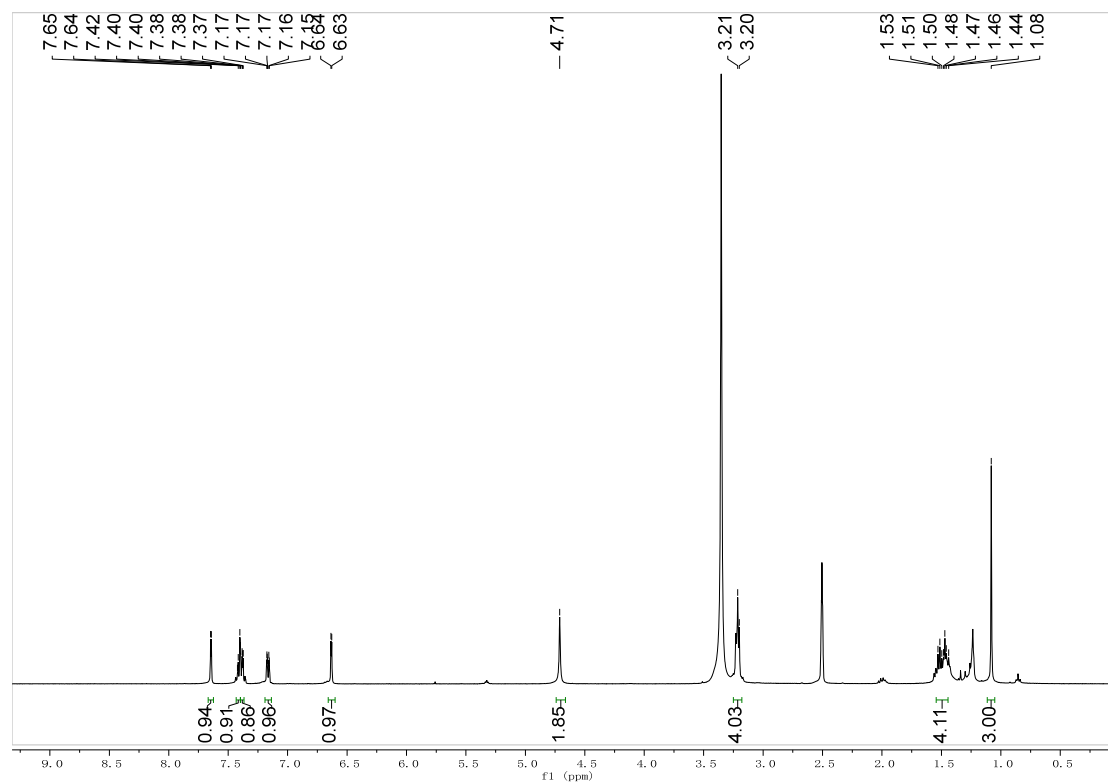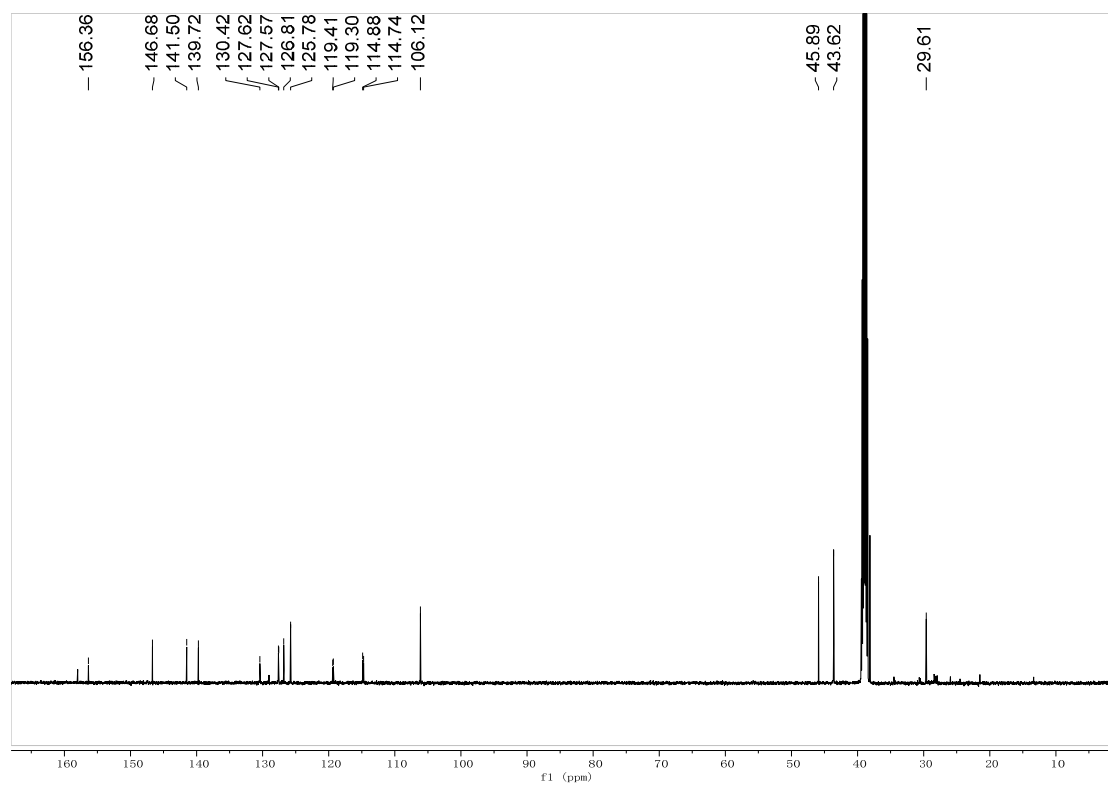

## SUPPORTING INFORMATION

20210743 252 (2.454) Cm (252-(55:58+60:62))

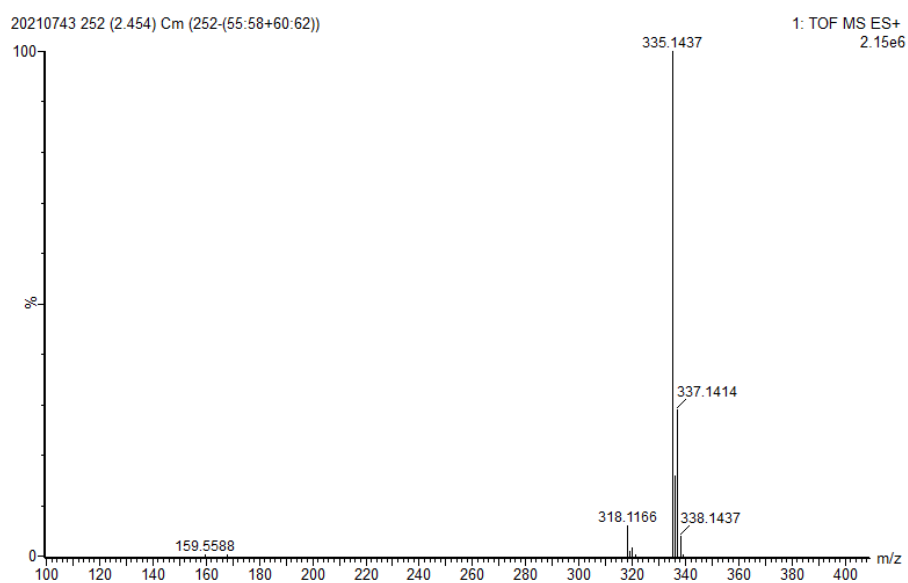

### Compound: 6

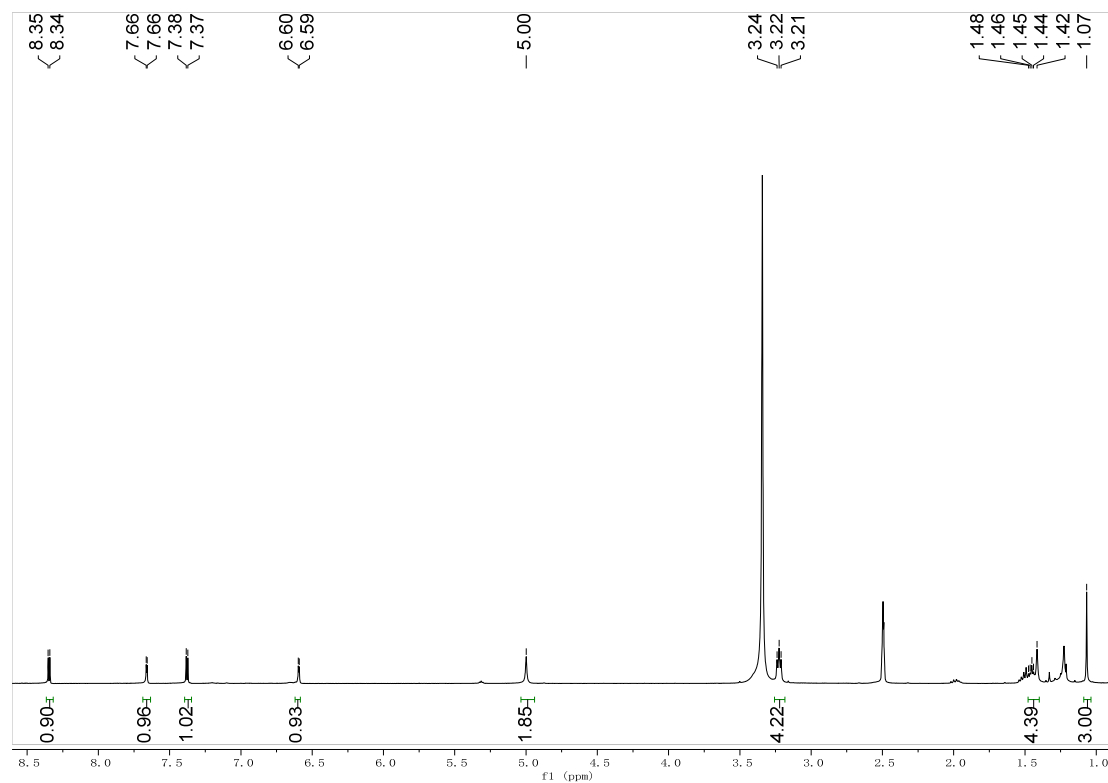

# SUPPORTING INFORMATION

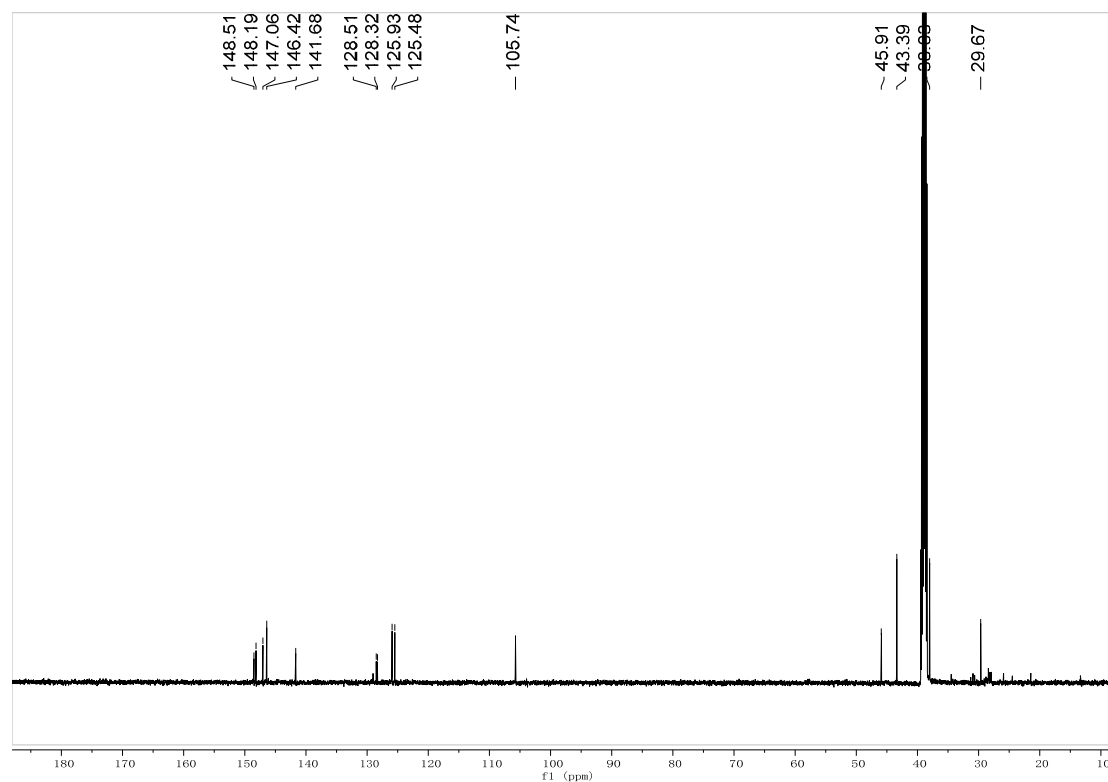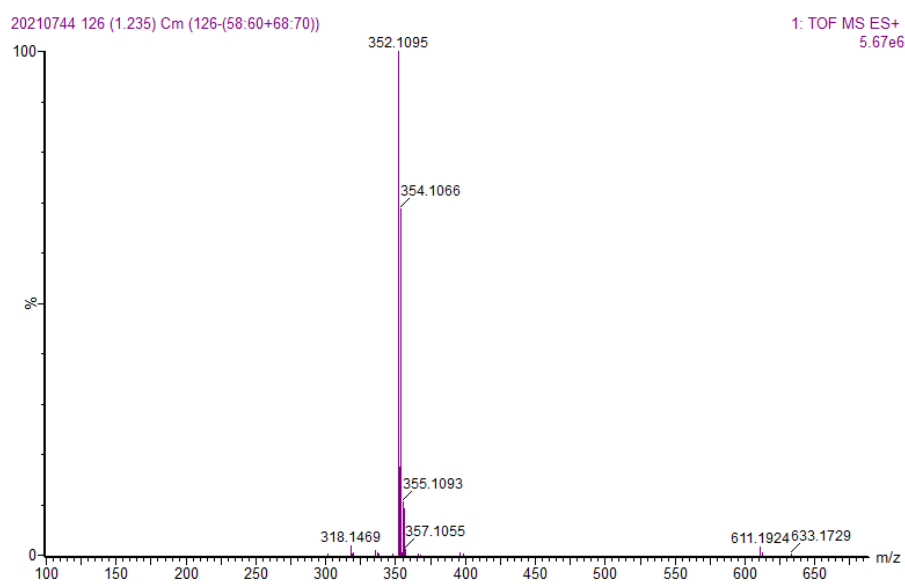

**Compound: 7**

# SUPPORTING INFORMATION

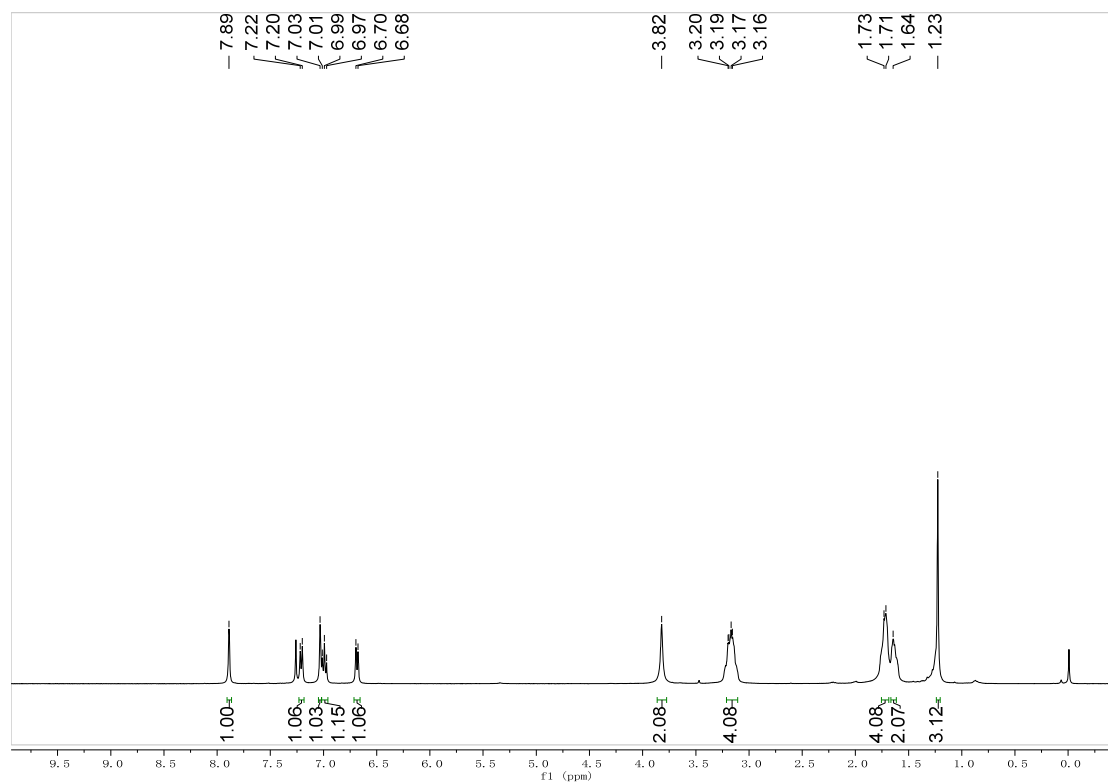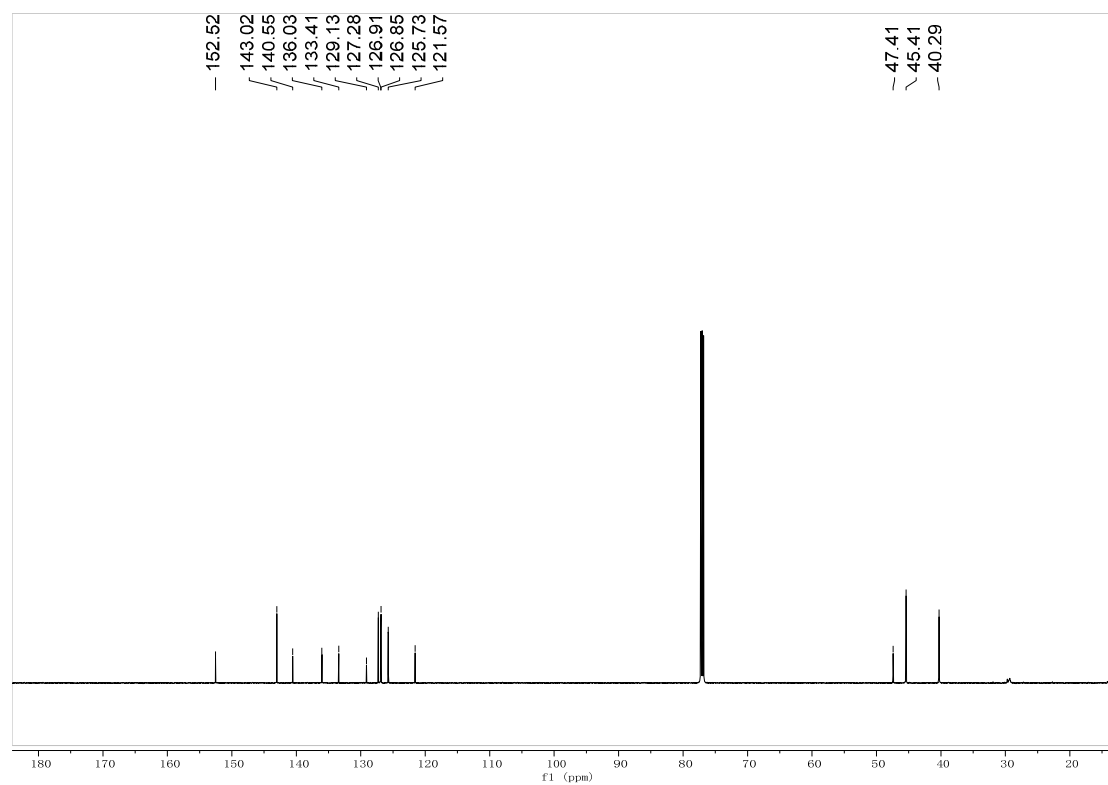

# SUPPORTING INFORMATION

20210568 54 (0.539) Cm (54-(418:420+425:427))

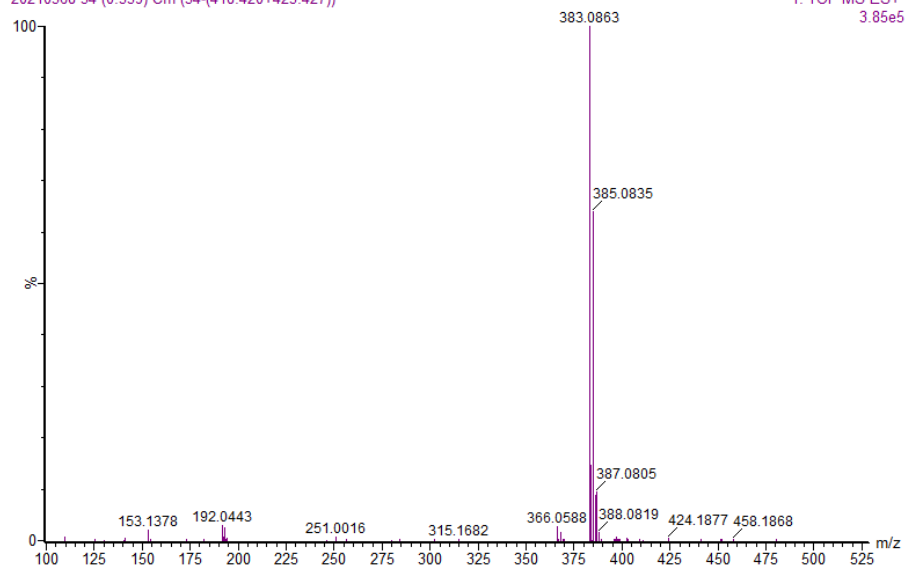

## Compound 8

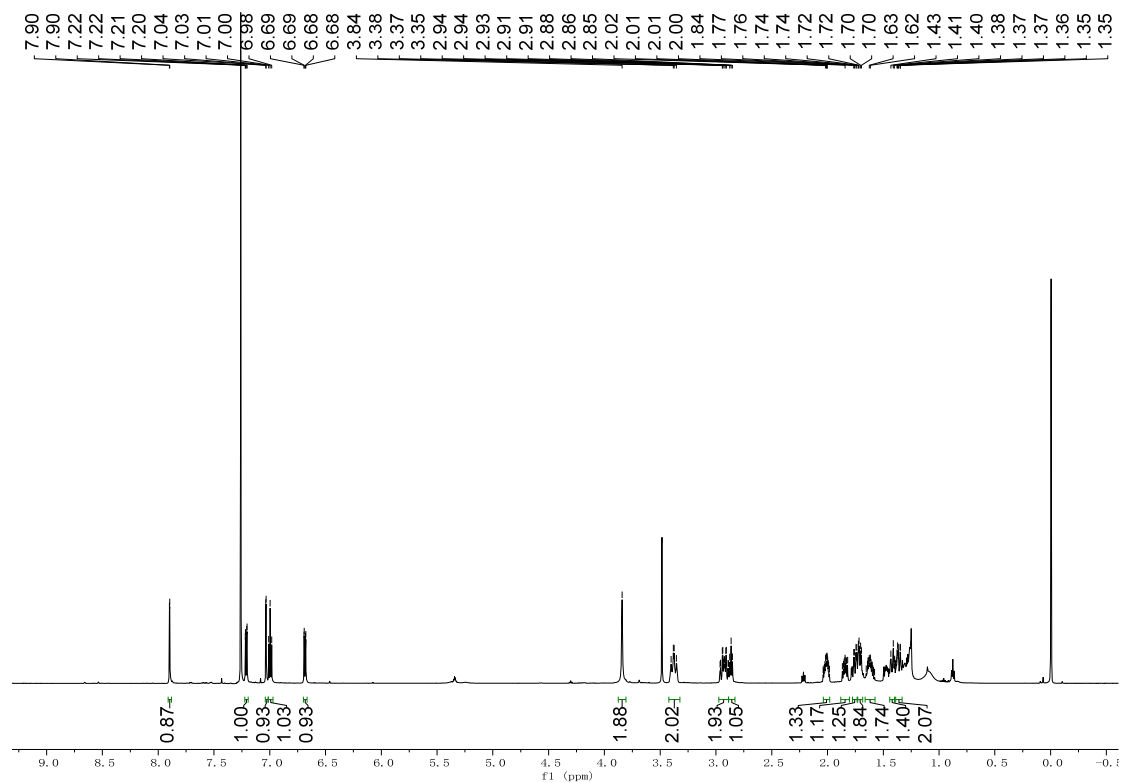

# SUPPORTING INFORMATION

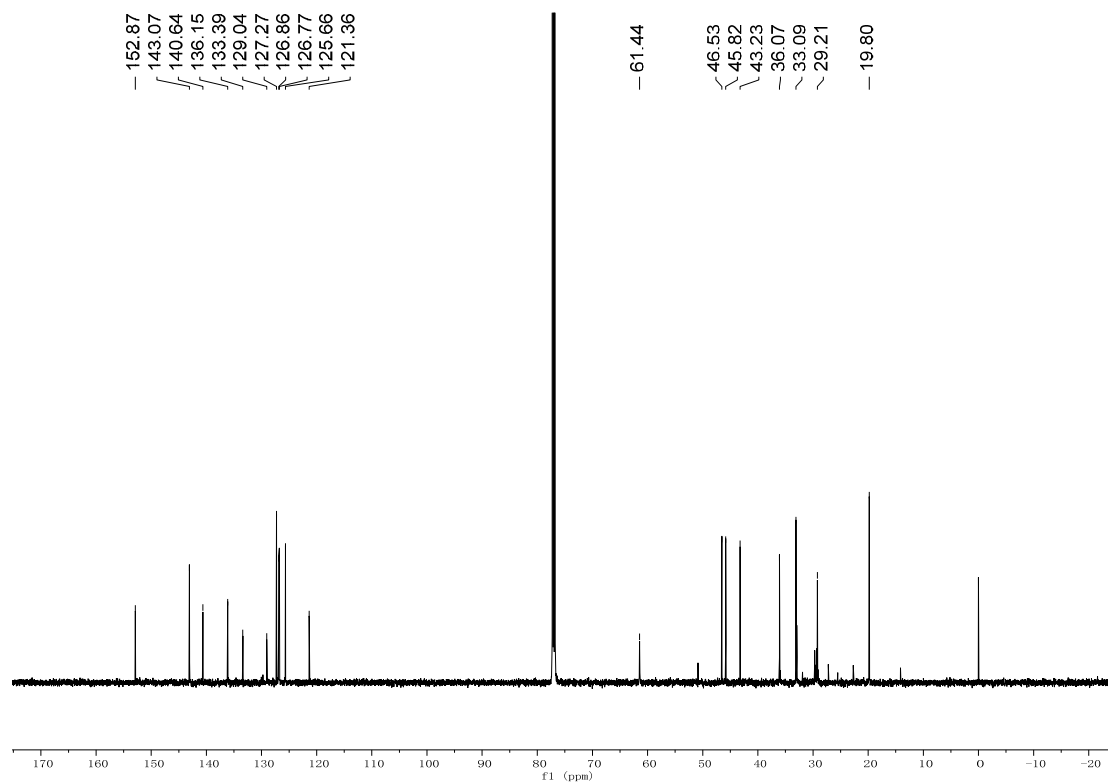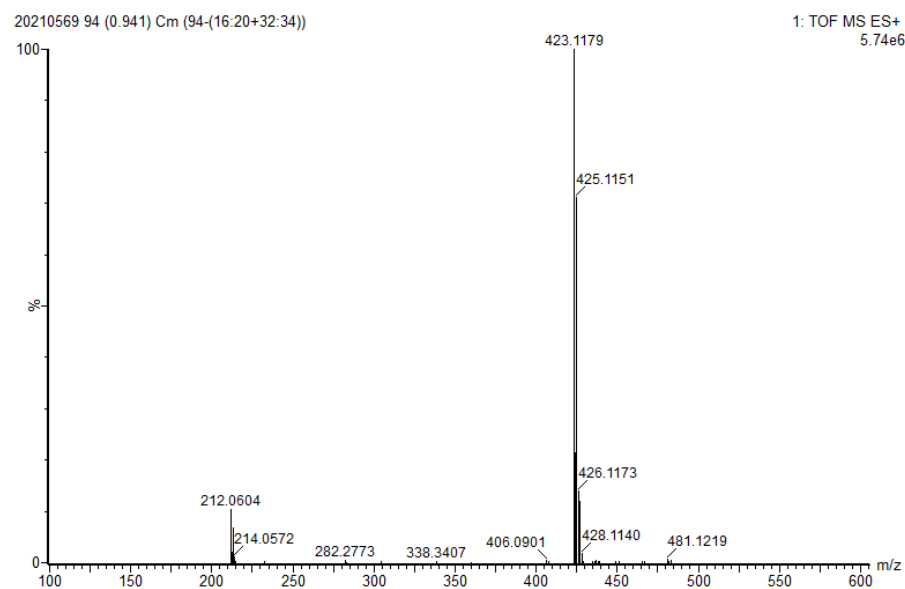

Supplement: s1 [file s1]
